# Supplementary material for: Service availability and readiness to provide maternal and newborn healthcare services in Kilimanjaro region, Tanzania: a cross sectional study
Source: PubMed Central journal article supplement — BMJ Open. 2024 Dec 9;14(12):e086275. doi: 10.1136/bmjopen-2024-086275 (PMC11628971; doi:10.1136/bmjopen-2024-086275), 2024-12-09
Supplement: bmjopen-14-12-s001.pdf [file bmjopen-14-12-s001.pdf]

**Supplemental Table 1 : Availability of equipment and medicines/commodities for basic delivery services N = 37**

| Delivery Equipment and Medicines    | Dispensaries (n=14) |                      | Health centers (n=14) |                     | District hospitals (n=8) |                      | Regional hospital (n=1) |                     |
|-------------------------------------|---------------------|----------------------|-----------------------|---------------------|--------------------------|----------------------|-------------------------|---------------------|
|                                     | Available n(%)      | Not - Available n(%) | Available n(%)        | Not- Available n(%) | Available n(%)           | Not - Available n(%) | Available n(%)          | Not- Available n(%) |
| Emergency Transport                 | 2(14)               | 12(86)               | 5(36)                 | 9(64)               | 8(100)                   | 0                    | 1(100)                  | 0                   |
| Examination Light                   | 2(14)               | 12(86)               | 11(79)                | 3(21)               | 8(100)                   | 0                    | 1(100)                  | 0                   |
| Delivery pack                       | 13(93)              | 1(7)                 | 14(100)               | 0                   | 8(100)                   | 0                    | 1(100)                  | 0                   |
| Suction apparatus                   | 11(79)              | 3(21)                | 13(93)                | 1(7)                | 8(100)                   | 0                    | 1(100)                  | 0                   |
| Manual vacuum extractor             | 2(14)               | 12(86)               | 4(29)                 | 10(71)              | 5(63)                    | 3(37)                | 1(100)                  | 0                   |
| Vacuum aspirator and D&C kit        | 3(21)               | 11(79)               | 5(36)                 | 9(64)               | 6(75)                    | 2(25)                | 1(100)                  | 0                   |
| Neonatal bag and mask               | 12(86)              | 2(14)                | 14(100)               | 0                   | 8(100)                   | 0                    | 1(100)                  | 0                   |
| Partograph                          | 12(86)              | 2(14)                | 14(100)               | 0                   | 8(100)                   | 0                    | 1(100)                  | 0                   |
| Gloves                              | 14(100)             | 0                    | 14(100)               | 0                   | 8(100)                   | 0                    | 1(100)                  | 0                   |
| Antibiotic eye Ointment for newborn | 11(79)              | 3(21)                | 13(93)                | 1(7)                | 7(88)                    | 1(12)                | 1(100)                  | 0                   |
| Injectable uterotonic               | 14(100)             | 0                    | 14(100)               | 0                   | 8(100)                   | 0                    | 1(100)                  | 0                   |
| Injectable antibiotics              | 14(100)             | 0                    | 14(100)               | 0                   | 8(100)                   | 0                    | 1(100)                  | 0                   |

---

|                               |        |       |         |   |        |   |        |   |
|-------------------------------|--------|-------|---------|---|--------|---|--------|---|
| Magnesium sulphate            | 13(93) | 1(7)  | 14(100) | 0 | 8(100) | 0 | 1(100) | 0 |
| Diazepam Injectable           | 12(86) | 2(14) | 14(100) | 0 | 8(100) | 0 | 1(100) | 0 |
| Skin disinfectant             | 12(86) | 2(14) | 14(100) | 0 | 8(100) | 0 | 1(100) | 0 |
| IV solution with infusion kit | 13(93) | 1(7)  | 14(100) | 0 | 8(100) | 0 | 1(100) | 0 |

---
