# Supplementary material for: Service availability and readiness to provide maternal and newborn healthcare services in Kilimanjaro region, Tanzania: a cross sectional study
Source: PubMed Central journal article supplement — BMJ Open. 2024 Dec 9;14(12):e086275. doi: 10.1136/bmjopen-2024-086275 (PMC11628971; doi:10.1136/bmjopen-2024-086275), 2024-12-09
Supplement: bmjopen-14-12-s002.pdf [file bmjopen-14-12-s002.pdf]

**Supplemental Table 2: Availability of BEmONC and CEmONC provided by health facilities N=37**

| Signal Functions                           | Facility level                       |                                     |                                   |                                 |
|--------------------------------------------|--------------------------------------|-------------------------------------|-----------------------------------|---------------------------------|
|                                            | Regional hospitals<br>(n=1)<br>n (%) | District hospital<br>(n=8)<br>n (%) | Health centers<br>(n=14)<br>n (%) | Dispensaries<br>(n=14)<br>n (%) |
| Parenteral antibiotics                     | 1(100)                               | 8(100)                              | 13(92.3)                          | 12(85.7)                        |
| Parenteral oxytocin's                      | 1(100)                               | 8(100)                              | 14(100)                           | 14(100)                         |
| Parenteral anticonvulsants                 | 1(100)                               | 8(100)                              | 14(100)                           | 10(71.4)                        |
| Manual removal of placenta                 | 1(100)                               | 8(100)                              | 14(100)                           | 14(100)                         |
| Removal of retained products of conception | 1(100)                               | 8(100)                              | 14(100)                           | 12(85.7)                        |
| Assisted vaginal delivery                  | 1(100)                               | 6(75)                               | 14(100)                           | 13(92.3)                        |
| Neonatal resuscitation                     | 1(100)                               | 8(100)                              | 14(100)                           | 13(92.3)                        |
| Caesarian section                          | 1(100)                               | 7(87.5)                             | N/A                               | N/A                             |
| Blood transfusion                          | 1(100)                               | 8(100)                              | N/A                               | N/A                             |
